# Supplementary material for: Structure-based identification of salicylic acid derivatives as malarial threonyl tRNA-synthetase inhibitors
Source: PLOS journal article supplement (doi:10.1371/journal.pone.0296995), 2024-04-01
Supplement: S1 (10.1371/journal.pone.0296995.s001) [file journal.pone.0296995.s001.docx]

Supporting information for

**Structure-based identification of salicylic acid derivatives as malarial threonyl tRNA-synthetase inhibitors**

*Raitis Bobrovs1,*, Jekaterina Bolsakova1, Jhon Alex Rodriguez Buitrago1, Larisa Varaceva1, Marija Skvorcova1, Iveta Kanepe1, Anastasija Rudnickiha1, Emilio Parisini1,2, Aigars Jirgensons1,**

*1 Latvian Institute of Organic Synthesis, Aizkraukles 21, Riga, LV1006, Latvia*

*2 Department of Chemistry “G. Ciamician”, University of Bologna, Via Selmi 2, 40126 Bologna, Italy*

Table of Contents

[1 Compound activity data 1](#_Toc153798187)

[2 X-ray crystallography data 15](#_Toc153798188)

[3 1H and 13C NMR spectra 16](#_Toc153798189)

[4 References 25](#_Toc153798190)

# Compound activity data

Table SI1. The SAR of adenosine binding subsite substituent. Compound activity is expressed as fraction of PfThrRS inhibited at 100 µM compound concentration. IC50 values were determined for compounds that inhibited PfThrRS by more than 50% at 100 μM concentration. Compounds are arranged by activity.

| No | Com ID. | Molecular structure | ThrRS inhibition @100 µM, % | IC50, μM |
| --- | --- | --- | --- | --- |
|  | MolPort-000-644-251  MS-3294 |  | 100 | 13.1±1.4 |
| 1 | MolPort-005-489-927 |  | 100 | 31±2 |
| 2 | MolPort-000-645-175 |  | 93 | 31±2 |
| 3 | MolPort-000-639-492 |  | 84 | 32±2 |
| 4 | MolPort-001-727-407 |  | 100 | 32±2 |
| 5 | JB-1928 |  | 74±7 | 36±4 |
| 5 | MolPort-000-628-123 |  | 88 | 46±2 |
| 7 | JB-1811 |  | 80±9 | 46±3 |
| 8 | LVV-457 |  | 67±11 | 55±3 |
| 9 | MolPort-000-644-250 |  | 63 | 67±3 |
| 10 | MolPort-000-628-314 |  | 64 | 76±4 |
| 11 | MolPort-000-639-774 |  | 57 | 84±4 |
| 12 | MolPort-005-461-419 |  | 63 | 83±4 |
| 13 | MolPort-000-645-406 |  | 58 | 89±4 |
| 14 | MolPort-000-645-321 |  | 57 | 90±4 |
| 15 | MolPort-000-487-836 |  | 55 | 92±3 |
| 16 | MolPort-000-630-019 |  | 50±6 | 99 |
| 17 | MolPort-002-363-286 |  | 47±5 | 106 |
| 18 | MolPort-000-630-020 |  | 49±7 | 121 |
| 19 | LVV-521 |  | 47±7 | 121±5 |
| 20 | JB-1707 |  | 47±10 |  |
| 21 | JB-1815 |  | 46±6 |  |
| 22 | LVV-470 |  | 45±13 |  |
| 23 | MolPort-000-639-491 |  | 44±7 |  |
| 24 | MolPort-000-628-101 |  | 41±9 |  |
| 25 | MolPort-000-628-503 |  | 40±6 |  |
| 26 | LVV-501 |  | 39±6 |  |
| 27 | LVV-455 |  | 35±11 |  |
| 28 | JB-1718 |  | 35±9 |  |
| 29 | MolPort-000-644-253 |  | 34±11 |  |
| 30 | MolPort-000-639-493 |  | 33±6 |  |
| 31 | MolPort-005-461-413 |  | 33±7 |  |
| 32 | MolPort-000-644-418 |  | 31±10 |  |
| 33 | MolPort-005-836-906 |  | 31±4 |  |
| 34 | LVV-466 |  | 30±21 |  |
| 35 | MolPort-005-490-725 |  | 30±8 |  |
| 36 | Am-1-6 |  | 28±12 |  |
| 37 | MolPort-000-645-169 |  | 28±8 |  |
| 38 | MolPort-005-461-256 |  | 28±7 |  |
| 39 | MolPort-011-233-641 |  | 26±6 |  |
| 40 | MolPort-005-490-184 |  | 24±5 |  |
| 41 | JB-1757 |  | 23±6 |  |
| 42 | LVV-448 |  | 22±11 |  |
| 43 | MolPort-000-487-837 |  | 22±7 |  |
| 44 | MolPort-005-489-990 |  | 21±5 |  |
| 45 | MolPort-002-363-849 |  | 21±7 |  |
| 46 | JB-1736 |  | 20±6 |  |
| 47 | JB-1817 |  | 20±8 |  |
| 48 | MolPort-005-461-441 |  | 20±12 |  |
| 49 | MolPort-046-534-557 |  | 19±6 |  |
| 50 | JB-1794 |  | 18±7 |  |
| 51 | MolPort-005-707-434 |  | 18±8 |  |
| 52 | MolPort-001-807-055 |  | 17±9 |  |
| 53 | JB-1749 |  | 16±4 |  |
| 54 | MolPort-000-644-252 |  | 16±5 |  |
| 55 | Am-4-1 |  | 15±18 |  |
| 56 | MolPort-000-487-838 |  | 15±7 |  |
| 57 | MolPort-005-321-630 |  | 15±8 |  |
| 58 | MolPort-046-531-659 |  | 14±2 |  |
| 59 | LVV-512 |  | 13±4 |  |
| 60 | LVV-491 |  | 13±4 |  |
| 61 | MolPort-000-654-184 |  | 13±6 |  |
| 62 | MolPort-002-361-564 |  | 13±7 |  |
| 63 | JB-1737 |  | 11±3 |  |
| 64 | JB-1810-1 |  | 11±8 |  |
| 65 | MolPort-046-636-480 |  | 11±7 |  |
| 66 | MolPort-005-328-565 |  | 10±7 |  |
| 67 | MolPort-047-512-573 |  | 10±11 |  |
| 68 | MolPort-005-462-016 |  | 9±4 |  |
| 69 | MolPort-005-818-094 |  | 9±8 |  |
| 70 | Am-6-4 |  | 8±4 |  |
| 71 | MolPort-046-636-408 |  | 8±10 |  |
| 72 | MolPort-046-640-330 |  | 8±9 |  |
| 73 | MolPort-047-482-193 |  | 8±10 |  |
| 74 | LVV-459 |  | 7±1 |  |
| 75 | LVV-465 |  | 7±3 |  |
| 76 | Am-2-3-AF |  | 7±3 |  |
| 77 | MolPort-005-490-683 |  | 7±3 |  |
| 78 | Am-17-1 |  | 6±4 |  |
| 79 | JB-1715 |  | 6±1 |  |
| 80 | JB-1809 |  | 6±7 |  |
| 81 | JB-1714 |  | 5±2 |  |
| 82 | MolPort-046-556-083 |  | 5±9 |  |
| 83 | Am-18-1 |  | 4±7 |  |
| 84 | JB-1805 |  | 4±4 |  |
| 85 | MolPort-045-923-934 |  | 4±9 |  |
| 86 | LVV-475 |  | 3±7 |  |
| 87 | JB-1709 |  | 3±1 |  |
| 88 | LVV-456 |  | 2±1 |  |
| 89 | LVV-520 |  | 2±6 |  |
| 90 | JB-1712 |  | 1±2 |  |
| 91 | JB-1801 |  | 1±2 |  |
| 92 | LVV-451 |  | 0±1 |  |
| 93 | Am-9-1 |  | 0±3 |  |
| 94 | Am-15-1 |  | 0±3 |  |
| 95 | JB-1788 |  | 0±5 |  |
| 96 | LVV-514 |  | -2±6 |  |
| 97 | Am-16-1 |  | -3±4 |  |
| 98 | LVV-489 |  | -3±3 |  |
| 99 | JB-1779 |  | -3±2 |  |
| 100 | MolPort-045-952-383 |  | -3±7 |  |
| 101 | MolPort-045-949-778 |  | -4±8 |  |
| 102 | LVV-483 |  | -5±4 |  |
| 103 | LVV-498 |  | -5±4 |  |
| 104 | Am-11-2 |  | -6±9 |  |
| 105 | JB-1766 |  | -6±2 |  |
| 106 | JB-1769 |  | -7±2 |  |
| 107 | MolPort-046-629-425 |  | -7±6 |  |
| 108 | Am-5-6 |  | -8±5 |  |
| 109 | Am-12-1 |  | -8±5 |  |
| 110 | Am-14-1 |  | -9±3 |  |
| 111 | MolPort-045-916-016 |  | -9±8 |  |
| 112 | MolPort-046-636-407 |  | -9±8 |  |
| 113 | JB-1775 |  | -11±8 |  |
| 114 | MolPort-005-360-459 |  | -20±7 |  |
| 115 | MolPort-045-921-367 |  | -22±6 |  |
| 116 | MolPort-045-922-144 |  | -25±8 |  |
| 117 | MolPort-044-692-961 |  | -28±15 |  |
| 118 | MolPort-005-346-417 |  | -39±2 |  |
| 119 | MolPort-045-922-607 |  | -44±10 |  |

Table SI2. The SAR of arginine binding group. Compound activity is expressed as fraction of PfThrRS inhibited at 100 µM compound concentration. IC50 values were determined for compounds that inhibited PfThrRS by more than 50% at 100 μM concentration. Compounds are arranged by activity.

| No | Com ID. | Molecular structure | ThrRS inhibition @100 µM, % | IC50, μM |
| --- | --- | --- | --- | --- |
|  | MolPort-000-644-251  MS-3294 |  | 100 | 13.1±1.4 |
| 1 | MolPort-000-628-093 |  | 46±8 |  |
| 2 | MolPort-000-632-025 |  | 42±8 |  |
| 3 | MolPort-005-872-521 |  | 20±6 |  |
| 4 | JB-1810-2 |  | 17±8 |  |
| 5 | LVV-473 |  | 0±6 |  |
| 6 | JB-1769-1 |  | -2±5 |  |
| 7 | JB-1713 |  | n.a |  |
|  |  |  |  |  |
| 8 | JB-1876 |  | 11±10 |  |
| 9 | LVV-563 |  | 10±8 |  |
| 10 | JB-1895 |  | 0±6 |  |

Table SI3. The SAR of zinc ion binding group. Compound activity is expressed as fraction of PfThrRS inhibited at 100 µM compound concentration. IC50 values were determined for compounds that inhibited PfThrRS by more than 50% at 100 μM concentration. Compounds are arranged by activity.

| No | Com ID. | Molecular structure | ThrRS inhibition @100 µM, % | IC50, μM |
| --- | --- | --- | --- | --- |
|  | MolPort-000-644-251  MS-3294 |  | 100 | 13.1±1.4 |
| 1 | MS-3295 |  | 19±8 |  |
| 2 | MS-3297 |  | 16±7 |  |
| 3 | MS-3299 |  | 16±11 |  |
| 4 | MolPort-008-385-777 |  | 11±7 |  |
| 5 | MolPort-001-890-044 |  | 11±6 |  |
| 6 | MolPort-020-111-835 |  | 7±6 |  |
| 7 | MolPort-020-124-499 |  | 6±5 |  |
| 8 | MolPort-009-352-348 |  | 5±2 |  |
| 9 | MolPort-023-229-111 |  | 5±2 |  |
| 10 | MolPort-000-630-143 |  | 2±4 |  |
| 11 | MolPort-009-578-369 |  | 1±2 |  |
| 12 | MolPort-020-113-459 |  | 0±2 |  |
| 13 | MolPort-005-210-215 |  | 0±3 |  |
| 14 | MolPort-009-343-020 |  | 0±5 |  |
| 15 | MolPort-002-705-434 |  | -1±2 |  |
| 16 | MolPort-005-171-762 |  | -3±3 |  |

# X-ray crystallography data

Table SI4. Diffraction data collection and refinement statistics.

| Wavelength (Å) | 1.00 |
| --- | --- |
| Resolution range (Å) | 79.33–2.08 (2.166–2.129) |
| Space group | P 21 21 21 |
| Rmerge (all I+ & I-) | 0.239 |
| Multiplicity | 11.1 |
| Unit cell (Å, °) | 85.78 110.50 113.97 90 90 90 |
| Total reflections | 525473 |
| Unique reflections | 47446 |
| Completeness (%) | 99.89 (99.83) |
| CC1/2 | 0.994 (0.747) |
| R-work | 0.1900 (0.1932) |
| R-free | 0.2400 (0.2418) |
| Ligands | 2 |
| RMS (bonds) (Å) | 0.0154 |
| RMS (angles) (°) | 2.368 |
| Ramachandran favored (%) | 96.0 |
| Ramachandran allowed (%) | 3.3 |
| Ramachandran outliers (%) | 0.7 |

Statistics for the highest-resolution shell are shown in parentheses.

# 1H and 13C NMR spectra
